# Supplementary material for: Local hydrogen bonding environment induces the deprotonation of surface hydroxyl for continuing ammonia decomposition
Source: Royal Society of Chemistry journal article supplement (doi:10.1039/d3cp06328c), 2024-01-01
Supplement: d3cp06328c1.pdf [file d3cp06328c1.pdf]

---

## Supporting Information

# The local hydrogen bonding environment promotes the deprotonation of surface hydroxyl groups for continuing ammonia decomposition

Hui Su, Jie Sun\*, Donghui Li, Jinjia Wei

School of Chemical Engineering and Technology, Xi'an Jiaotong University,  
Xi'an 710049, China

### S1. DFT+U

DFT+U and DFT calculations for NH<sub>3</sub> mediated PT, a Hubbard U = 5.4 eV correction was applied to the 3d orbitals of Ti based on Mulliken population analysis.

**Table S1.** DFT+U and DFT calculation results of NH<sub>3</sub> mediated PT

| NH <sub>3</sub> mediated PT |                            | O charge | H charge | OH length | H-bond     | Ea    |
|-----------------------------|----------------------------|----------|----------|-----------|------------|-------|
|                             |                            | (e)      | (e)      | (Å)       | length (Å) | (eV)  |
|                             | only NH <sub>3</sub>       | -0.598   | 0.144    | 0.989     | 1.938      | 0.355 |
| DFT+U                       | neighbour NH <sub>3</sub>  | -0.606   | 0.146    | 0.988     | 1.911      | 0.357 |
|                             | neighbour H <sub>2</sub> O | -0.614   | 0.153    | 0.994     | 1.863      | 0.284 |
|                             | only NH <sub>3</sub>       | -0.489   | 0.134    | 0.987     | 1.945      | 0.354 |
| DFT                         | neighbour NH <sub>3</sub>  | -0.505   | 0.139    | 0.984     | 1.971      | 0.401 |
|                             | neighbour H <sub>2</sub> O | -0.521   | 0.144    | 0.993     | 1.858      | 0.314 |

### S2. The a-TiO<sub>2</sub>(101) slab model

---

\* Author to whom correspondence should be addressed. E-mail: sunjie@xjtu.edu.cn (JS); Tel/Fax: +86 029 8266 8037

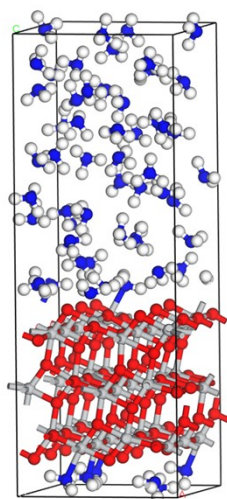

non-hydroxylated a-TiO<sub>2</sub>(101) slab model including 60 NH<sub>3</sub> molecules

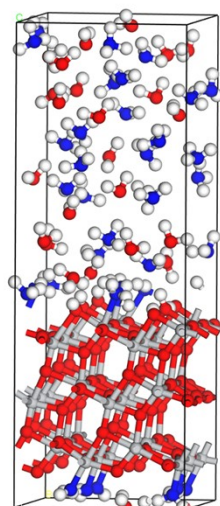

hydroxylated a-TiO<sub>2</sub>(101) slab model including 36 NH<sub>3</sub> molecules and 24 H<sub>2</sub>O molecules

FPMD simulation was performed in a long relaxation time ( $\sim 30$  ps) to obtain well relaxed configurations of ammonia and water molecules before sampling.

### S3. Experiment

Anatase TiO<sub>2</sub> sample with loading of about 0.1 wt % Pt was prepared by photodeposition method. The TiO<sub>2</sub> powder was dispersed into an aqueous ethanol solution of the metal precursors, stirred vigorously in a beaker, and then light irradiated under a 300 W Xe lamp for 3 h. The powders were then filtered by aspiration, washed with ethanol and water, and dried at 323 K overnight. The in-situ diffuse reflectance infrared Fourier transform spectra (DRIFTS) were performed by Bruke Tensor II FTIR NEXUS spectrometer. The sample was heated at 473 K for 90 min under flowing He and photo irradiation for surface clean-up. In dark condition, ammonia (1 mL/min) carried by He gas (20 mL/min) was introduced into the reaction cell until the adsorption reached equilibrium after 60 min. Later, the Xe lamp was turned on to driven the photocatalytic decomposition reaction and the spectrum was taken. After 60 min, water vapor (0.5 ml /min) carried by He gas (20 mL/min) was introduced into the cell, and the test was finished after 120 min.

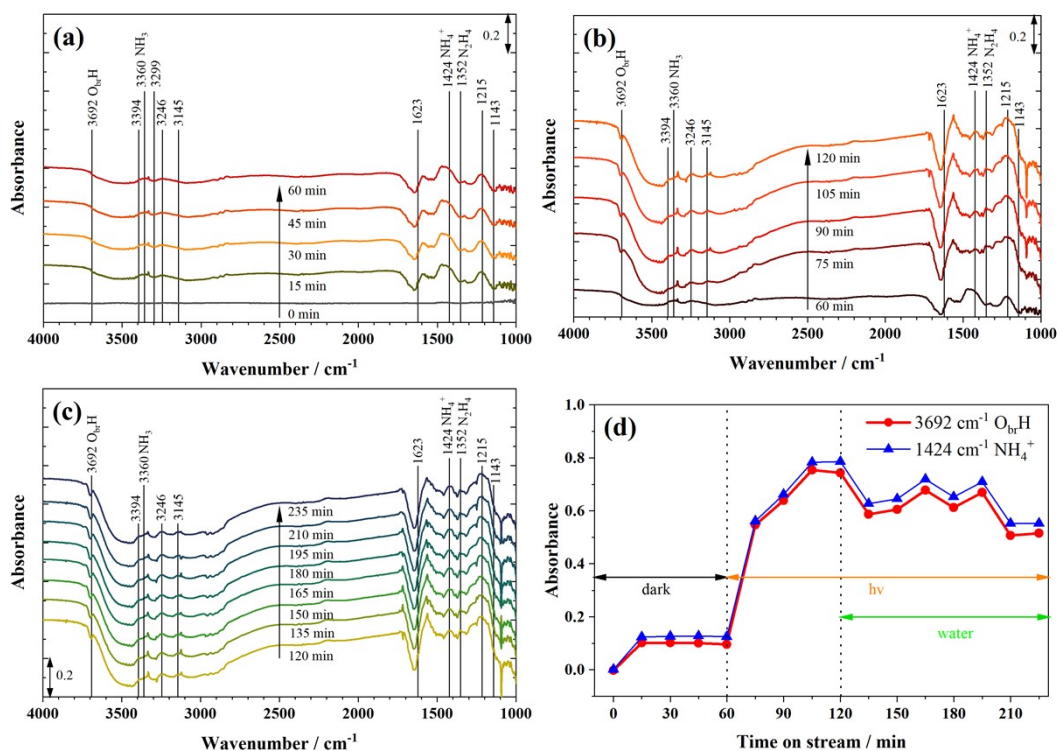

In-situ DRIFTS spectra results of the Pt/TiO<sub>2</sub> sample under the flow of ammonia vapor. (a) In the dark from 0 to 60 min. (b) Under photoirradiation from 60 to 120 min. (c) Under photoirradiation with flowing water vapor from 120 to 235 min. (d) The time course of the band intensity at 3692 cm<sup>-1</sup> and 1424 cm<sup>-1</sup> during these procedures.

#### S4. Definition of H-bonds occupancy

$$Occupancy = N_{H-bonds} / N_{total}$$

Where  $N_{H-bonds}$  is number of frames with hydrogen bonds exist along FPMD trajectory,  $N_{total}$  is number of total frames.

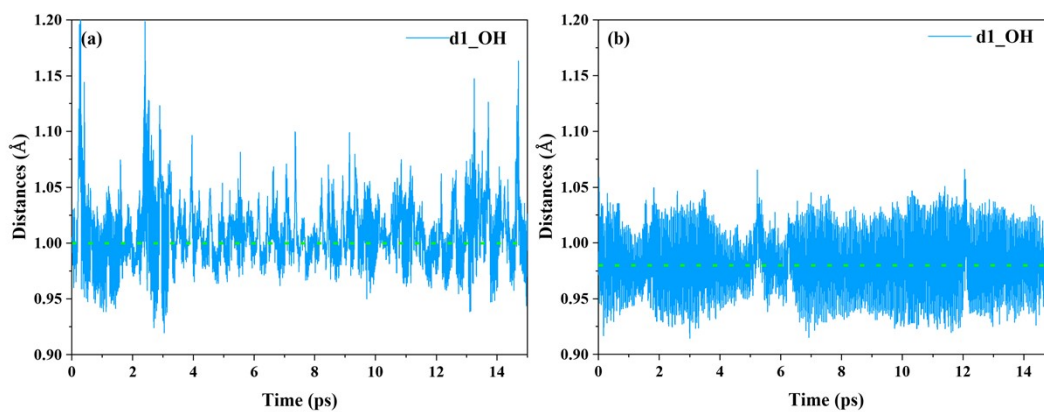

**Figure S1.** Time evolution of OH bond length of surface hydroxyl group for (a) ammonia-water mixture and (b) pure ammonia. The green dashed line is the average bond length.

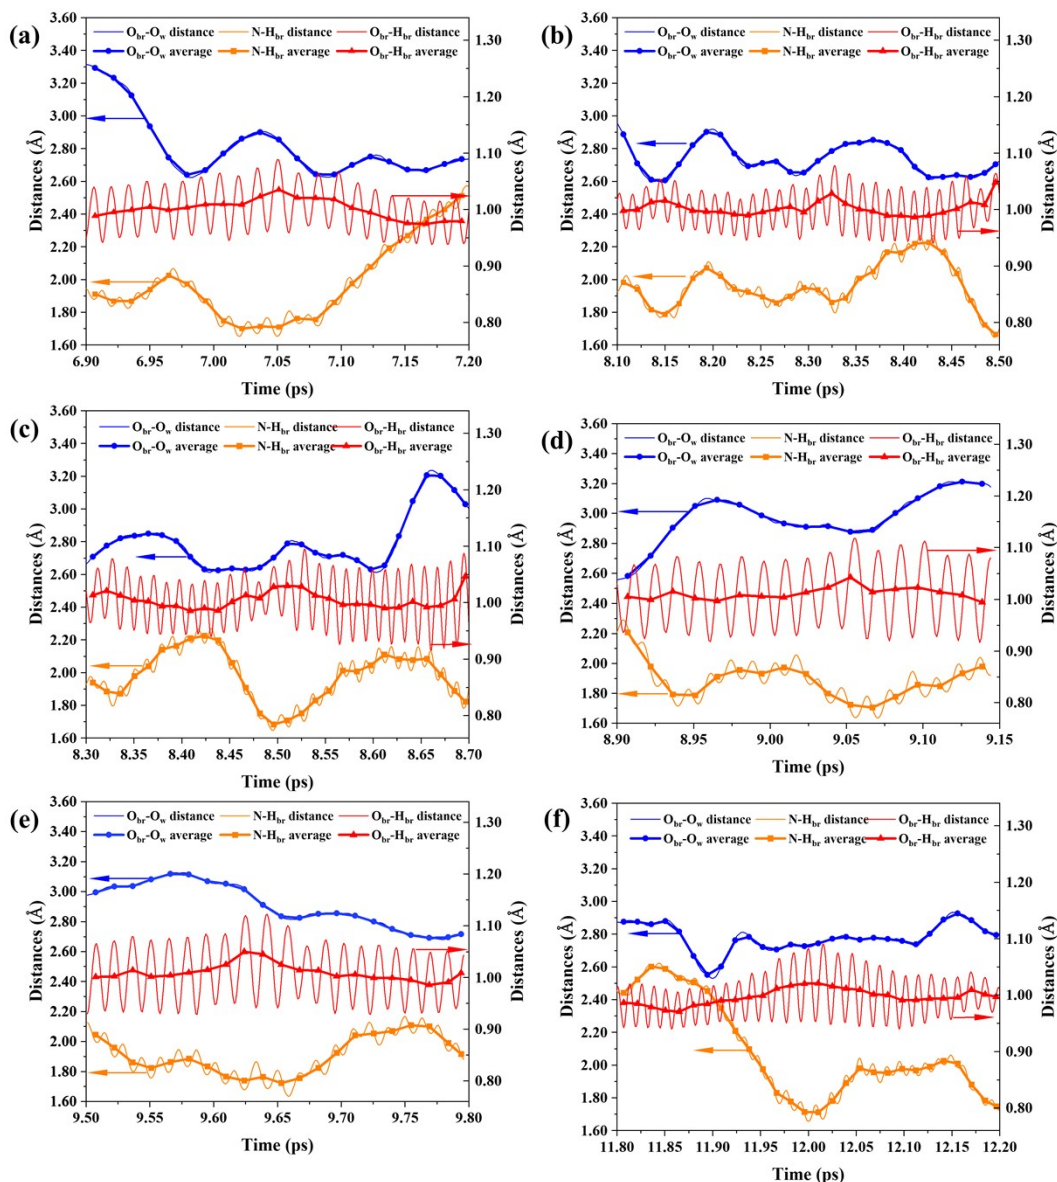

**Figure S2.** Time evolution of  $O_{br}-O_w$ ,  $N-H_{br}$ ,  $O_{br}-H_{br}$  distances, and its average distances, at about (a) 7.05 ps, (b) 8.33 ps, (c) 8.53 ps, (d) 9.05 ps, (e) 9.62 ps, (f) 12.02 ps.

As the  $O_{br}-O_w$  distances reduces, the  $O_{br}-H_{br}$  bond lengths increases, and the  $O_{br}-O_w$  distances reduction are not strictly always reduced (there may be some fluctuations, but the overall effects are on a downward trend over longer time interval). Generally, when the  $O_{br}-O_w$  distances are less than 3.0 Å, the increase in the  $O_{br}-H_{br}$  bond lengths is more pronounced due to the reduction of the  $O_{br}-O_w$  distances.

(a) direct PT

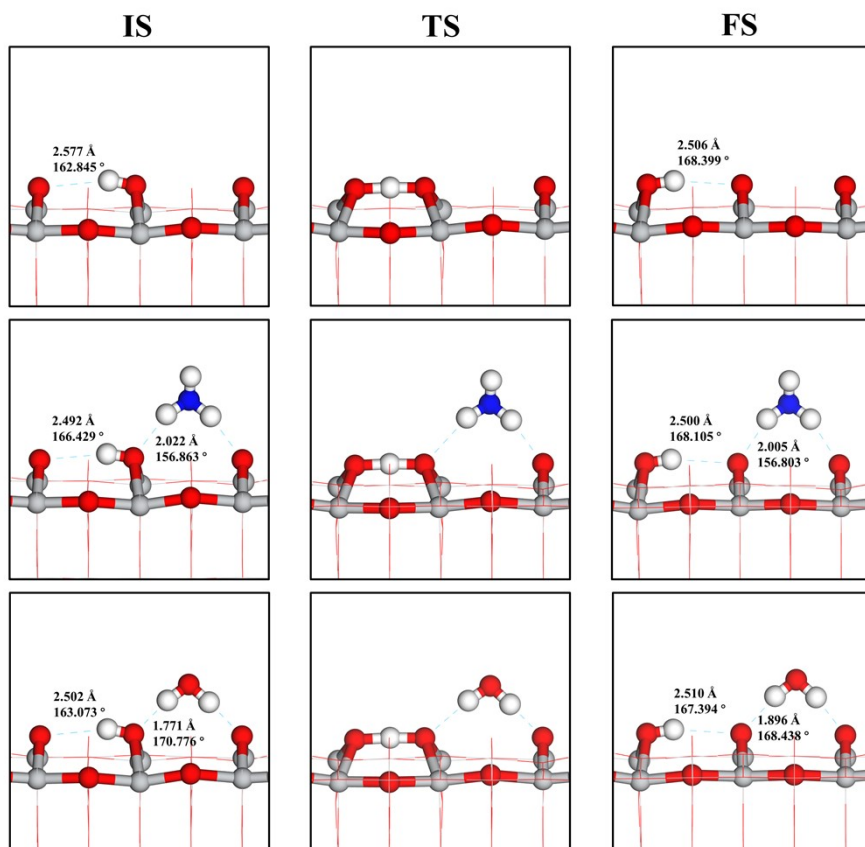

(b) NH<sub>3</sub> mediated PT

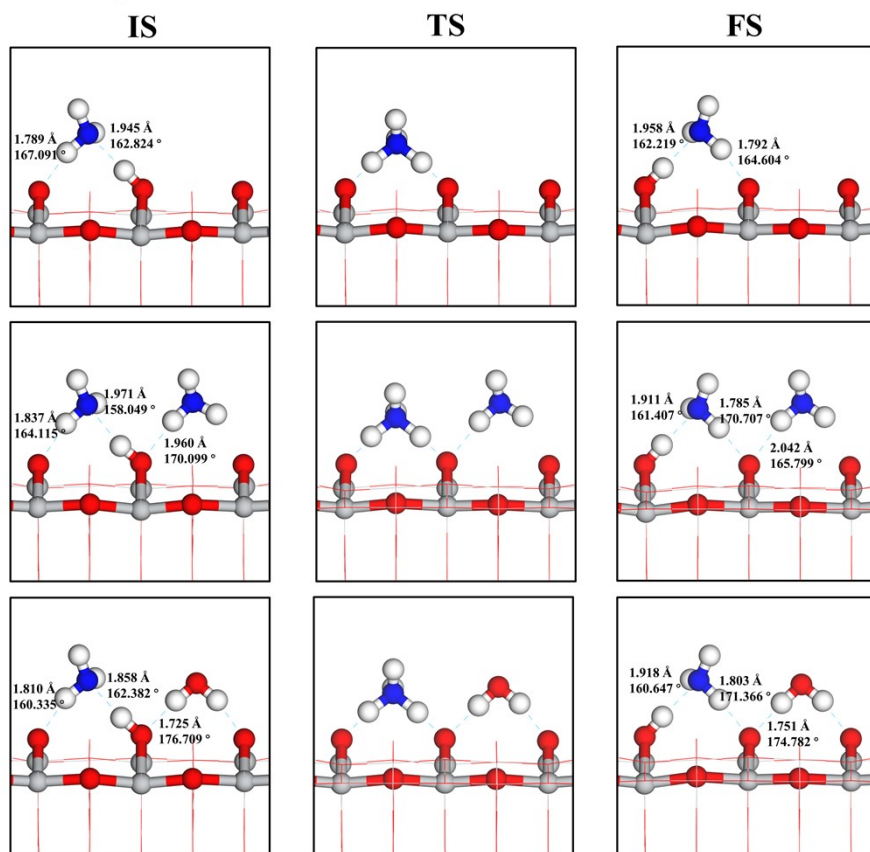

(c) H<sub>2</sub>O mediated PT

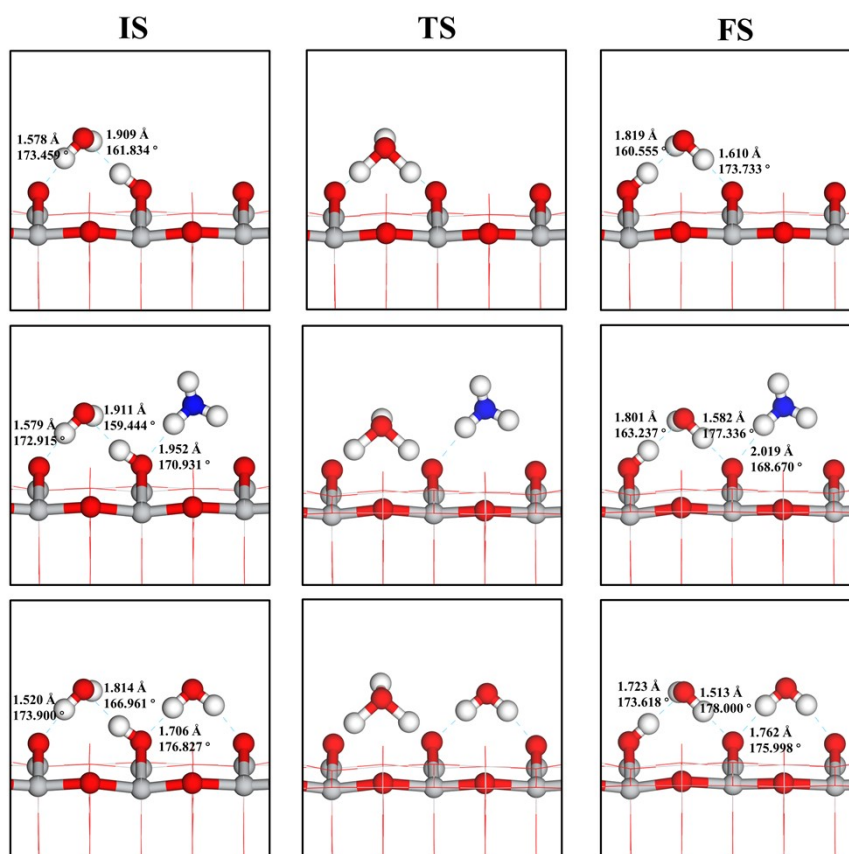

(d) NH<sub>3</sub> mediated PT on high hydroxyl covered surface

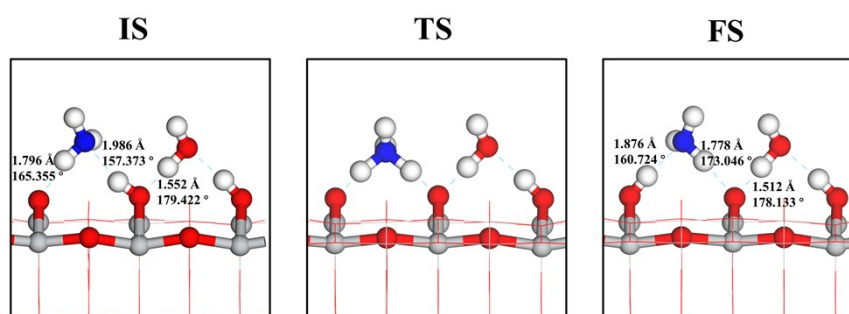

**Figure S3.** Initial state (IS), transitional state (TS) and final state (FS) adsorption configuration of (a) direct PT, (b) NH<sub>3</sub>-mediated PT and (c) H<sub>2</sub>O-mediated PT with existence of neighbouring H<sub>2</sub>O molecule; (d) NH<sub>3</sub>-mediated PT with existence of neighbouring H<sub>2</sub>O molecule on high hydroxyl covered surface. The bond length values and bond angle values of H-bonds associated with O<sub>b</sub>H deprotonation are marked out.

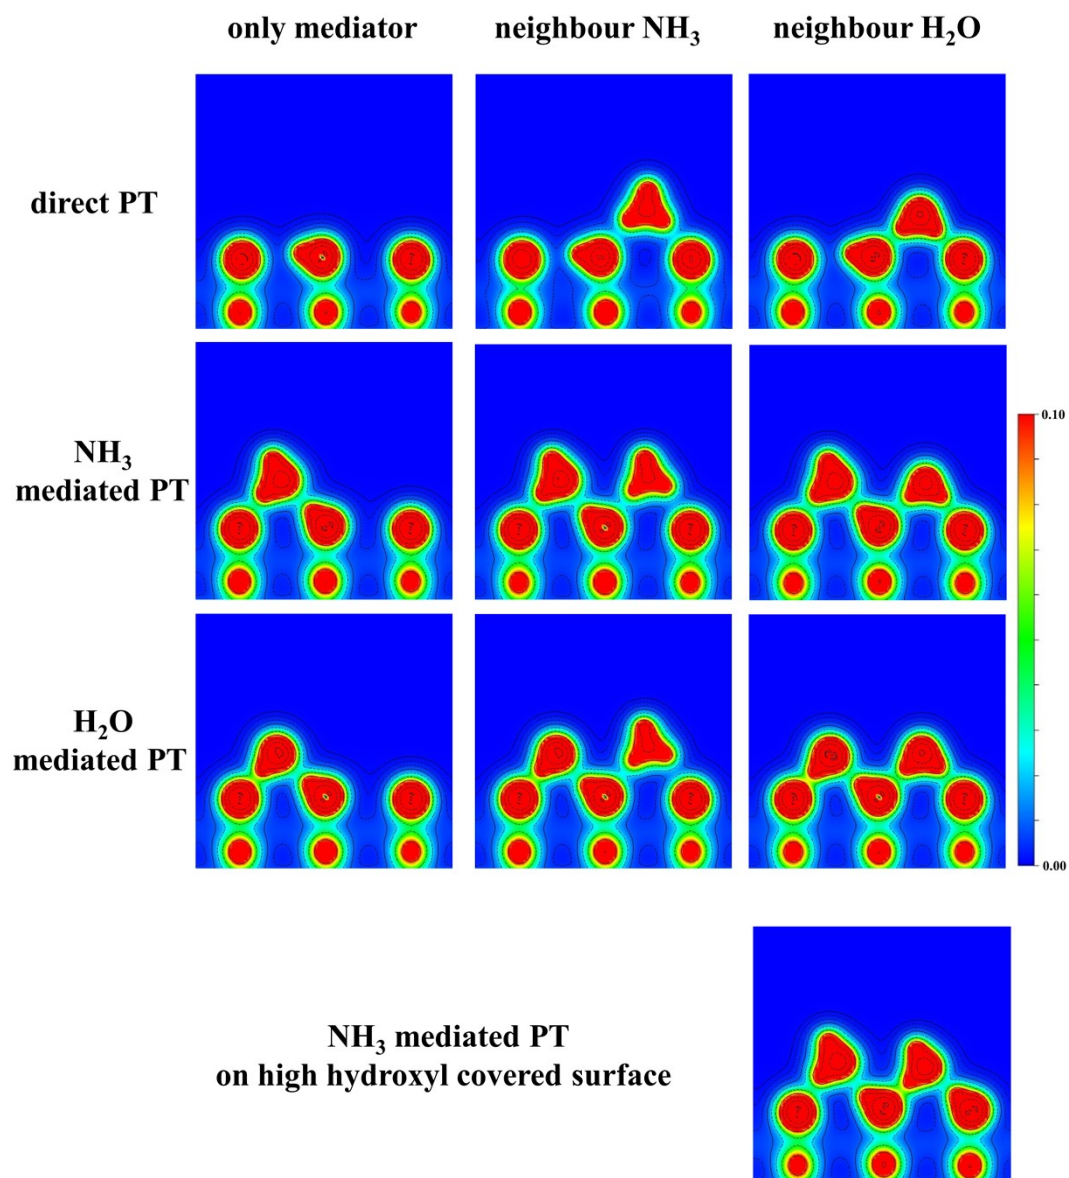

**Figure S4.** Electron density contour map of initial state configuration.

As shown in Figure S4, there is an electron sharing density of local H-bonds involving O<sub>br</sub>H groups in NH<sub>3</sub> and H<sub>2</sub>O mediated PT. While the H-bonds of O<sub>br</sub>H groups in direct PT have a lower electron sharing density.

## CP2K input script

```
&GLOBAL
PRINT_LEVEL LOW
PROJECT_NAME cp2k
RUN_TYPE MD
&END GLOBAL
&MOTION
&MD
ENSEMBLE NVT
STEPS 32000
TIMESTEP [fs] 1.0
TEMPERATURE [K] 330
&THERMOSTAT
REGION GLOBAL
TYPE NOSE
&NOSE
LENGTH 4
YOSHIDA 5
TIMECON 100
MTS 2
&END NOSE
&END THERMOSTAT

&PRINT
FORCE_LAST .TRUE.
&ENERGY
&EACH
MD 1
&END EACH
&END ENERGY
&PROGRAM_RUN_INFO
&EACH
MD 1
&END EACH
&END PROGRAM_RUN_INFO
&END PRINT
&END MD

&PRINT
&TRAJECTORY
&EACH
MD 1
&END EACH
&END TRAJECTORY
&VELOCITIES
&EACH
MD 1
&END EACH
&END VELOCITIES

&RESTART
BACKUP_COPIES 0
&EACH
MD 1
&END EACH
&END RESTART
&RESTART_HISTORY OFF
&END RESTART_HISTORY
&END PRINT
&END MOTION

&FORCE_EVAL
METHOD QS
&DFT
UKS .TRUE.
CHARGE 0
MULTIPLICITY 1
BASIS_SET_FILE_NAME ./BASIS_MOLOPT
POTENTIAL_FILE_NAME ./GTH_POTENTIALS
&MGRID
NGRIDS 5
CUTOFF [Ry] 280
&END MGRID
&QS
METHOD GPW
EPS_DEFAULT 1.000E-10
EXTRAPOLATION ASPC
EXTRAPOLATION_ORDER 3
&END QS
&POISSON
PERIODIC XYZ
PSOLVER PERIODIC
&END POISSON
&SCF
SCF_GUESS ATOMIC
EPS_SCF 1.0E-6
MAX_SCF 50
&OT
MINIMIZER DIIS
PRECONDITIONER FULL_ALL
ENERGY_GAP 0.1
&END OT
&OUTER_SCF
EPS_SCF 1.0E-6
MAX_SCF 3
&END OUTER_SCF
&PRINT
&RESTART
BACKUP_COPIES 0
&END RESTART
&END PRINT
&END SCF
&XC
&XC_FUNCTIONAL BLYP
&END XC_FUNCTIONAL
&VDW_POTENTIAL
POTENTIAL_TYPE PAIR_POTENTIAL
&PAIR_POTENTIAL
PARAMETER_FILE_NAME ./dftd3.dat
TYPE DFTD3(BJ)
REFERENCE_FUNCTIONAL BLYP
R_CUTOFF [angstrom] 16
&END PAIR_POTENTIAL
&END VDW_POTENTIAL
&END XC
&PRINT
&MULLIKEN OFF
&END MULLIKEN
&HIRSHFELD OFF
&END HIRSHFELD
&END PRINT
&END DFT

&PRINT
&FORCES OFF
&END FORCES
&TOTAL_NUMBERS OFF
&END TOTAL_NUMBERS
&END PRINT

&SUBSYS
&CELL
A [angstrom] 10.463234000 0.000000000 0.000000000
B [angstrom] 0.000000000 11.408130000 0.000000000
C [angstrom] 0.000000000 0.000000000 29.431765000
PERIODIC XYZ
&END CELL
&COORD
Ti 2.02431500E+00 1.09896510E+01 3.70870100E+00
Ti 2.02797700E+00 3.38341400E+00 3.51886600E+00
Ti 1.94856200E+00 7.22908500E+00 3.62894100E+00
Ti 3.32081000E+00 1.10458930E+01 7.23521900E+00
Ti 3.48340900E+00 3.49795200E+00 7.28672500E+00
Ti 3.46363300E+00 7.27118100E+00 7.25729300E+00
Ti 4.87846700E+00 1.10644880E+01 1.07799850E+01
Ti 4.78722800E+00 3.58693500E+00 1.07735100E+01
Ti 4.78890200E+00 7.32388600E+00 1.08070630E+01
Ti 7.23028000E+00 1.38254800E+00 3.61128200E+00
Ti 7.23770900E+00 5.17015100E+00 3.72753700E+00
Ti 7.36630200E+00 9.03692600E+00 3.64336300E+00
Ti 8.56789600E+00 1.40559200E+00 7.10925100E+00
Ti 8.67932900E+00 5.19650400E+00 7.23109900E+00
Ti 8.56883800E+00 9.00715100E+00 7.12808800E+00
Ti 9.99057700E+00 1.47837600E+00 1.08117720E+01
Ti 9.97279000E+00 5.20620100E+00 1.08800540E+01
Ti 1.01020100E+01 9.06373500E+00 1.07108210E+01
Ti 9.64257100E+00 1.10307200E+01 2.51965600E+00
Ti 2.49652000E-01 1.10351690E+01 6.23188900E+00
Ti 9.57173500E+00 3.41455800E+00 2.53790400E+00
Ti 4.85283000E-01 3.49133500E+00 6.17567500E+00
Ti 9.53867200E+00 7.17044700E+00 2.62561100E+00
Ti 4.13401000E-01 7.17341300E+00 6.28516100E+00
Ti 1.72998500E+00 1.09637550E+01 9.88202100E+00
Ti 1.78669600E+00 3.27127300E+00 9.82374600E+00
Ti 1.80249500E+00 7.12732500E+00 9.88643600E+00
Ti 4.15148400E+00 1.38231900E+00 2.74127800E+00
Ti 4.21823900E+00 5.30043100E+00 2.64886200E+00
Ti 4.36169000E+00 8.92501300E+00 2.61472100E+00
Ti 5.57343300E+00 1.42030800E+00 6.30223100E+00
```





|   |                |                |                |                              |                |                |                |
|---|----------------|----------------|----------------|------------------------------|----------------|----------------|----------------|
| H | 5.31467800E+00 | 1.01885740E+01 | 2.34859880E+01 | H                            | 1.72015000E+00 | 7.28532700E+00 | 2.48601590E+01 |
| H | 4.43838500E+00 | 8.93014700E+00 | 2.41017010E+01 | H                            | 4.39036000E-01 | 6.72872600E+00 | 2.42518030E+01 |
| H | 5.84338300E+00 | 2.92218500E+00 | 1.58637400E+01 | H                            | 1.29377500E+00 | 4.21654800E+00 | 1.66475090E+01 |
| H | 4.33009100E+00 | 3.16301000E+00 | 1.65374340E+01 | H                            | 2.00893400E+00 | 4.92807100E+00 | 1.54667050E+01 |
| H | 5.57876900E+00 | 4.04611100E+00 | 1.69686100E+01 | H                            | 5.43741100E+00 | 1.32048800E+00 | 2.44587090E+01 |
| H | 2.28453500E+00 | 7.28452800E+00 | 2.24588180E+01 | H                            | 3.99369900E+00 | 8.68270000E-01 | 2.39127490E+01 |
| H | 2.22395300E+00 | 8.61836300E+00 | 2.14086910E+01 | H                            | 3.17307000E+00 | 2.20666900E+00 | 1.85078930E+01 |
| H | 8.60494000E-01 | 7.93764200E+00 | 2.20929810E+01 | H                            | 2.73372000E+00 | 3.67648800E+00 | 1.80611180E+01 |
| H | 8.11013100E+00 | 4.42657100E+00 | 1.49142700E+01 | H                            | 4.66962200E+00 | 9.33969700E+00 | 2.16827010E+01 |
| H | 7.77353000E+00 | 6.00739100E+00 | 1.46384940E+01 | H                            | 4.16550500E+00 | 8.72343200E+00 | 2.02905770E+01 |
| H | 6.59840800E+00 | 4.85779700E+00 | 1.51317710E+01 | H                            | 7.26962200E+00 | 8.42522400E+00 | 2.79310730E+01 |
| H | 7.48788400E+00 | 6.48174000E+00 | 2.05642930E+01 | H                            | 8.73122700E+00 | 8.50622200E+00 | 2.74937160E+01 |
| H | 6.42116100E+00 | 6.47968700E+00 | 2.17468630E+01 | H                            | 3.21262100E+00 | 8.07009000E-01 | 1.33852880E+01 |
| H | 7.69024300E+00 | 5.45706500E+00 | 2.19823170E+01 | H                            | 2.44661000E+00 | 1.71406700E+00 | 1.43762570E+01 |
| H | 5.41355500E+00 | 2.46118300E+00 | 2.67240740E+01 | H                            | 8.77444000E+00 | 2.44384300E+00 | 1.70651460E+01 |
| H | 6.92799900E+00 | 2.10422400E+00 | 2.62040140E+01 | H                            | 1.02086300E+01 | 2.04547200E+00 | 1.63066890E+01 |
| H | 6.32071400E+00 | 3.66200000E+00 | 2.60406680E+01 | H                            | 8.08449600E+00 | 9.25881400E+00 | 1.36110300E+01 |
| H | 9.84356900E+00 | 5.01579900E+00 | 2.16671030E+01 | H                            | 7.63625300E+00 | 9.82408500E+00 | 1.50420040E+01 |
| H | 9.96850000E+00 | 3.43897200E+00 | 2.10599240E+01 | H                            | 2.47339600E+00 | 9.50431600E+00 | 2.55759400E+01 |
| H | 7.94052000E-01 | 4.17456600E+00 | 2.16523870E+01 | H                            | 1.26081600E+00 | 9.08643800E+00 | 2.46938690E+01 |
| H | 6.68703000E-01 | 9.33068000E-01 | 2.91307130E+01 | H                            | 5.56140000E+00 | 6.92140800E+00 | 1.31560000E-01 |
| H | 1.34661400E+00 | 2.22800200E+00 | 2.83198670E+01 | H                            | 4.98456400E+00 | 8.17504400E+00 | 2.90135740E+01 |
| H | 1.04336940E+01 | 1.37832700E+00 | 2.77294650E+01 | H                            | 2.01249200E+00 | 1.31307000E-01 | 2.73715740E+01 |
| H | 6.89263300E+00 | 4.80965500E+00 | 2.79996490E+01 | H                            | 3.52379600E+00 | 1.96790000E+00 | 2.76164470E+01 |
| H | 7.99085000E+00 | 5.39774300E+00 | 2.69200900E+01 | H                            | 5.85625000E-01 | 7.17158800E+00 | 2.03729860E+01 |
| H | 6.80903200E+00 | 6.37655700E+00 | 2.74519230E+01 | H                            | 1.02172100E+01 | 6.05336600E+00 | 1.97028240E+01 |
| H | 2.71645600E+00 | 9.98185900E+00 | 1.50776170E+01 | H                            | 8.59436800E+00 | 6.37290700E+00 | 2.41617420E+01 |
| H | 3.04960400E+00 | 8.47222500E+00 | 1.49481170E+01 | H                            | 8.85186700E+00 | 4.78455700E+00 | 2.40660890E+01 |
| H | 4.19250000E+00 | 9.48640600E+00 | 1.55956170E+01 | H                            | 4.27118300E+00 | 4.77486000E+00 | 1.47276730E+01 |
| H | 4.11842000E+00 | 6.35579500E+00 | 2.49334440E+01 | H                            | 3.35659500E+00 | 4.63522500E+00 | 1.33911750E+01 |
| H | 5.25200300E+00 | 5.85075800E+00 | 2.59673830E+01 | H                            | 5.03353200E+00 | 3.55727400E+00 | 1.93478770E+01 |
| H | 4.56164100E+00 | 7.13953100E+00 | 2.63267450E+01 | H                            | 6.04103300E+00 | 4.63168900E+00 | 1.98705850E+01 |
| H | 6.66150100E+00 | 5.04923000E-01 | 2.79125300E+01 | H                            | 7.68783600E+00 | 7.78043800E+00 | 2.54417310E+01 |
| H | 5.76658300E+00 | 6.97030000E-02 | 2.91707400E+01 | H                            | 6.37355400E+00 | 7.19919600E+00 | 2.49799460E+01 |
| H | 5.65734800E+00 | 1.06817460E+01 | 2.77565420E+01 | H                            | 8.44118700E+00 | 1.06730760E+01 | 2.69813080E+01 |
| H | 3.44302100E+00 | 4.93252000E+00 | 2.19879090E+01 | H                            | 8.92354000E+00 | 1.13884780E+01 | 2.81644670E+01 |
| H | 2.43384500E+00 | 4.28716400E+00 | 2.30916020E+01 | H                            | 5.98223000E+00 | 3.96248900E+00 | 5.55672000E-01 |
| H | 4.02728600E+00 | 4.12859100E+00 | 2.32596570E+01 | H                            | 6.18260000E+00 | 2.40984700E+00 | 4.23818000E-01 |
| H | 8.88984900E+00 | 1.89317400E+00 | 1.93826060E+01 | H                            | 1.44360800E+00 | 4.48452000E-01 | 1.69324090E+01 |
| H | 7.64117000E+00 | 2.98983500E+00 | 1.91197800E+01 | H                            | 2.19183100E+00 | 1.76118200E+00 | 1.64456070E+01 |
| H | 7.41631600E+00 | 1.33143900E+00 | 1.90353110E+01 | H                            | 3.80431500E+00 | 2.34322400E+00 | 2.86409680E+01 |
| H | 5.86054300E+00 | 9.69734100E+00 | 1.90438460E+01 | H                            | 3.81383600E+00 | 3.79935400E+00 | 2.86403790E+01 |
| H | 6.58365500E+00 | 9.12168900E+00 | 1.77647400E+01 | H                            | 2.48961400E+00 | 2.08403200E+00 | 2.48060040E+01 |
| H | 7.49039600E+00 | 9.85751100E+00 | 1.89537850E+01 | H                            | 2.59299000E+00 | 6.29955000E-01 | 2.54058240E+01 |
| H | 2.15540000E-02 | 9.34083800E+00 | 2.88929040E+01 | H                            | 1.53620700E+00 | 4.95967100E+00 | 2.65045130E+01 |
| H | 1.02130250E+01 | 7.77211000E+00 | 2.90424170E+01 | H                            | 2.09075700E+00 | 3.90202700E+00 | 2.75761250E+01 |
| H | 7.73754000E-01 | 8.30281500E+00 | 2.78036330E+01 | H                            | 9.66653200E+00 | 9.65056800E+00 | 2.05392760E+01 |
| H | 1.48692500E+00 | 4.73664300E+00 | 1.96101140E+01 | H                            | 9.91524200E+00 | 9.55793400E+00 | 1.88640180E+01 |
| H | 3.10746600E+00 | 4.96480500E+00 | 1.97457950E+01 | H                            | 9.84995200E+00 | 1.10533560E+01 | 1.95833310E+01 |
| H | 2.02881400E+00 | 5.98423300E+00 | 1.89567280E+01 | &END COORD                   |                |                |                |
| H | 3.70920000E-01 | 8.00643300E+00 | 1.61565870E+01 | &KIND Ti                     |                |                |                |
| H | 9.55018100E+00 | 7.90490100E+00 | 1.52515590E+01 | BASIS SET DZVP-MOLOPT-SR-GTH |                |                |                |
| H | 4.49920000E-02 | 6.57836700E+00 | 1.53713460E+01 | POTENTIAL GTH-PBE-q12        |                |                |                |
| H | 9.57581600E+00 | 2.45753300E+00 | 2.53169400E+01 | &END KIND                    |                |                |                |
| H | 5.34983000E-01 | 2.36718100E+00 | 2.45043280E+01 | &KIND O                      |                |                |                |
| H | 2.34585000E-01 | 3.66325500E+00 | 2.54461460E+01 | BASIS SET DZVP-MOLOPT-SR-GTH |                |                |                |
| H | 3.50119600E+00 | 2.88990000E+00 | 2.14640230E+01 | POTENTIAL GTH-PBE-q6         |                |                |                |
| H | 2.74428800E+00 | 1.70322900E+00 | 2.06054970E+01 | &END KIND                    |                |                |                |
| H | 4.22357500E+00 | 1.32037300E+00 | 2.11476310E+01 | &KIND N                      |                |                |                |
| H | 1.03079260E+01 | 1.02909050E+01 | 2.59046930E+01 | BASIS SET DZVP-MOLOPT-SR-GTH |                |                |                |
| H | 1.04569220E+01 | 1.10841100E+01 | 2.45687840E+01 | POTENTIAL GTH-PBE-q5         |                |                |                |
| H | 9.28745000E+00 | 9.95470800E+00 | 2.48136560E+01 | &END KIND                    |                |                |                |
| H | 8.72934300E+00 | 2.31093900E+00 | 2.28458460E+01 | &KIND H                      |                |                |                |
| H | 7.55767400E+00 | 1.53872500E+00 | 2.20217560E+01 | MASS 2.014102                |                |                |                |
| H | 8.58913600E+00 | 7.17341000E-01 | 2.29641620E+01 | BASIS SET DZVP-MOLOPT-SR-GTH |                |                |                |
| H | 2.10006900E+00 | 9.13000000E-04 | 1.91692260E+01 | POTENTIAL GTH-PBE-q1         |                |                |                |
| H | 3.30794100E+00 | 1.10014010E+01 | 1.81161560E+01 | &END KIND                    |                |                |                |
| H | 2.35076700E+00 | 9.88055500E+00 | 1.85596930E+01 | &END SUBSYS                  |                |                |                |
| H | 6.81646100E+00 | 1.13726210E+01 | 1.67004860E+01 | &END FORCE_EVAL              |                |                |                |
| H | 7.75668400E+00 | 8.39066000E-01 | 1.58281280E+01 |                              |                |                |                |
